# Supplementary material
Source: Elsevier journal article supplement (https://www.sciencedirect.com/science/article/pii/S0034935613003332)
Supplement: mmc4 [file S0034935613003332:mmc4.pdf]

# HOJA DE DOCUMENTACIÓN DE HEMORRAGIA OBSTETRICA

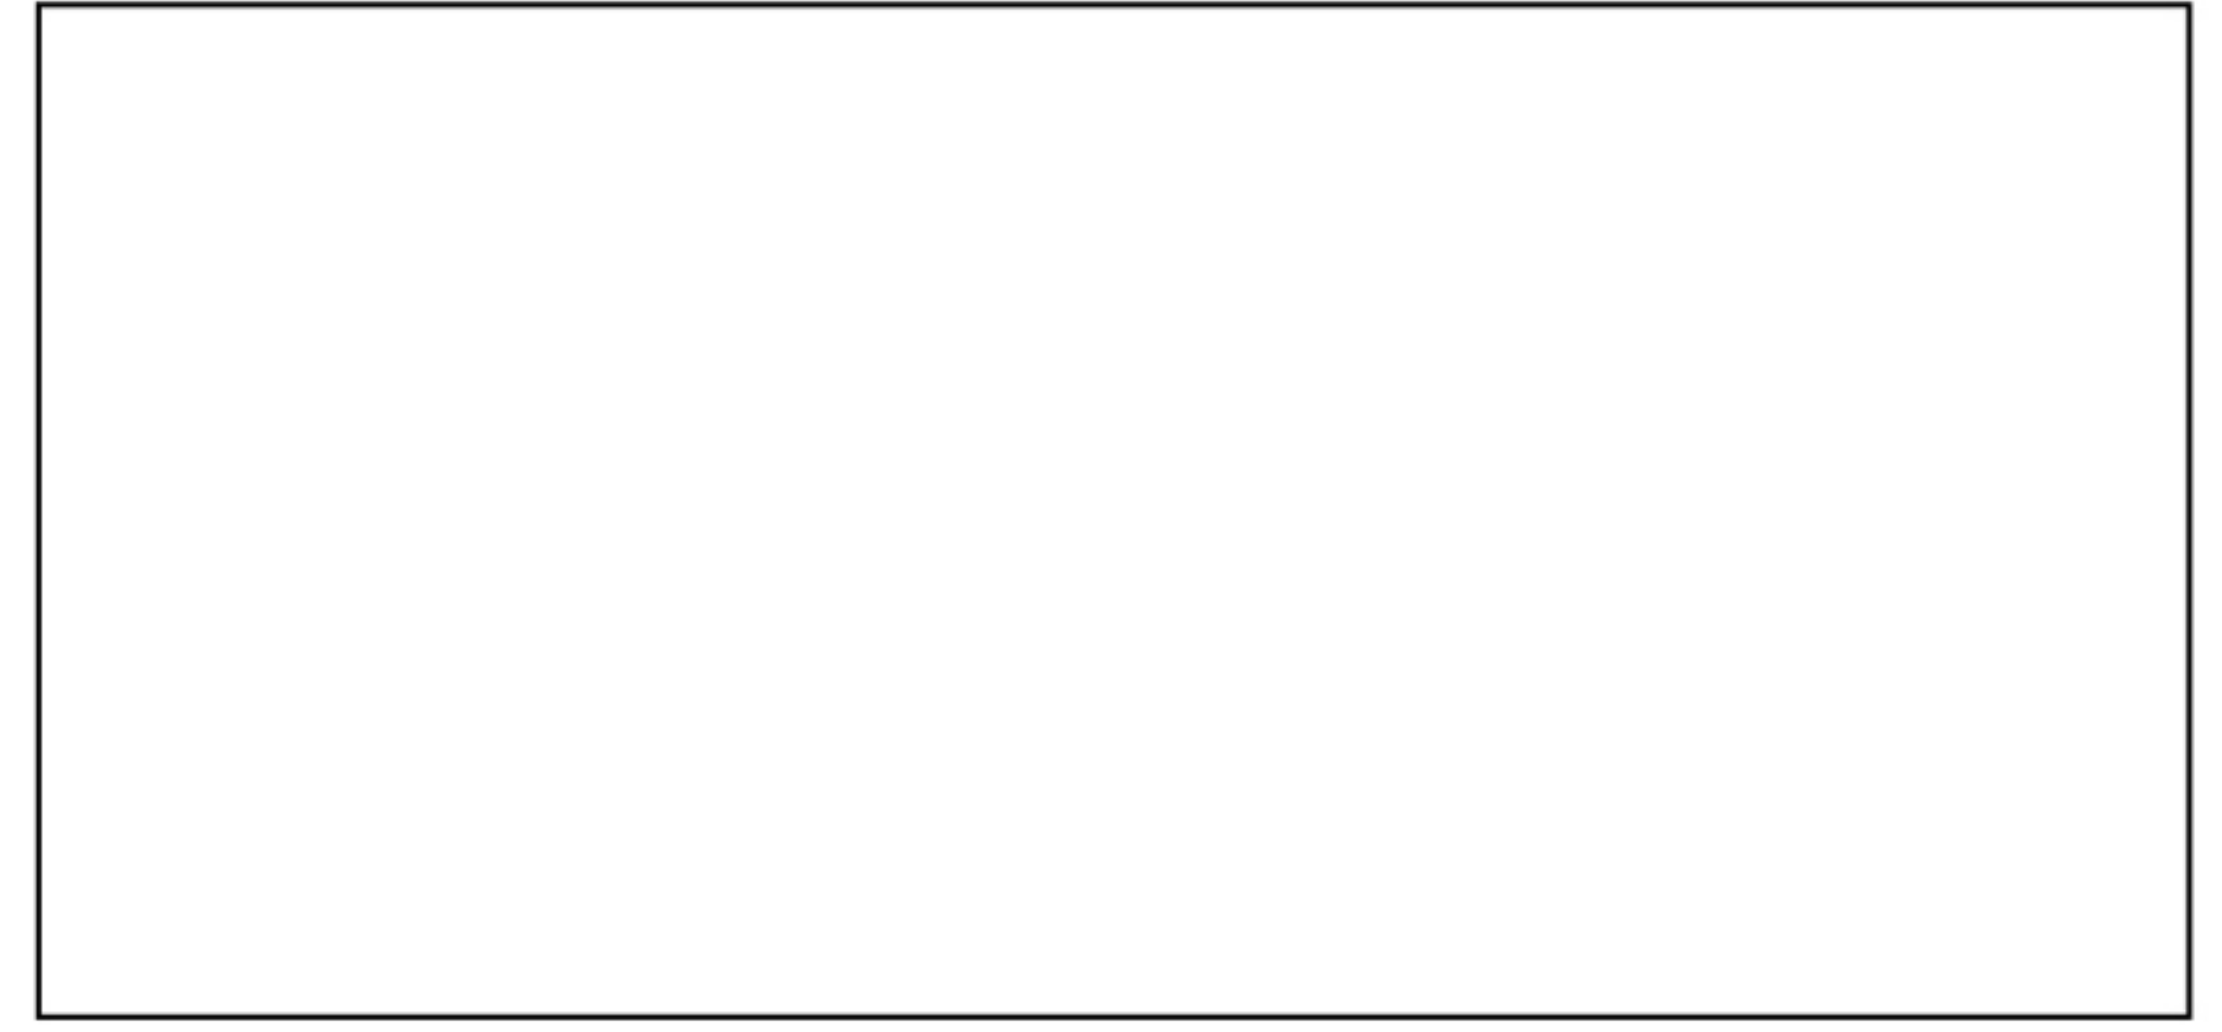

1. Hora del Parto: ..... Duración 3<sup>er</sup> estadio: .....

2. Causa probable del sangrado: Atonia Trauma Tejido retenido CID

3. Hora de inicio de Sangrado :.....

4. Perdida de sangre estimada: Total .....

Anteparto: ..... 3<sup>er</sup> estadio: ..... Postparto :.....

## 5. Personal y hora de llegada

| Nombre | hora de llegada | Nombre | Tiempo de llegada |
|--------|-----------------|--------|-------------------|
|        |                 |        |                   |
|        |                 |        |                   |
|        |                 |        |                   |
|        |                 |        |                   |
|        |                 |        |                   |
|        |                 |        |                   |

## 6. Exploración

| Unsd.            | Revisado por: | Problema Identificado | Actuación requerida | Tiempo |
|------------------|---------------|-----------------------|---------------------|--------|
| Vulva/<br>Periné |               |                       |                     |        |
|                  |               |                       |                     |        |
|                  |               |                       |                     |        |
|                  |               |                       |                     |        |
| Vagina           |               |                       |                     |        |
|                  |               |                       |                     |        |
|                  |               |                       |                     |        |
|                  |               |                       |                     |        |
| Cervix           |               |                       |                     |        |
|                  |               |                       |                     |        |
|                  |               |                       |                     |        |
|                  |               |                       |                     |        |
| Utero            |               |                       |                     |        |
|                  |               |                       |                     |        |
|                  |               |                       |                     |        |
|                  |               |                       |                     |        |
| Otros            |               |                       |                     |        |
|                  |               |                       |                     |        |
|                  |               |                       |                     |        |
|                  |               |                       |                     |        |

Activación de Protocolo HOS:

Si  No

Hora: .....

| Fecha y hora de comienzo de HO<br>..... | Hora de observación: |  |  |  |  |  |  |  |  |  |  |              |
|-----------------------------------------|----------------------|--|--|--|--|--|--|--|--|--|--|--------------|
|                                         |                      |  |  |  |  |  |  |  |  |  |  |              |
| <b>Constantes</b>                       |                      |  |  |  |  |  |  |  |  |  |  |              |
| Temperatura                             |                      |  |  |  |  |  |  |  |  |  |  |              |
| Presion arterial S/D<br>PAI: si/no      |                      |  |  |  |  |  |  |  |  |  |  |              |
| Frecuencia cardiaca                     |                      |  |  |  |  |  |  |  |  |  |  |              |
| Saturacion O <sub>2</sub>               |                      |  |  |  |  |  |  |  |  |  |  |              |
| Diuresis /<br>Tiempo de cateterización  |                      |  |  |  |  |  |  |  |  |  |  |              |
| <b>Fluidos</b>                          |                      |  |  |  |  |  |  |  |  |  |  | <b>Total</b> |
| Ringer lactato / Plasmalite             |                      |  |  |  |  |  |  |  |  |  |  |              |
| S.Salino                                |                      |  |  |  |  |  |  |  |  |  |  |              |
| Voluven                                 |                      |  |  |  |  |  |  |  |  |  |  |              |
| <b>Hemoderivados</b>                    |                      |  |  |  |  |  |  |  |  |  |  |              |
| Tipo de sangre                          |                      |  |  |  |  |  |  |  |  |  |  |              |
| CH                                      |                      |  |  |  |  |  |  |  |  |  |  |              |
| PFC                                     |                      |  |  |  |  |  |  |  |  |  |  |              |
| Plaquetas                               |                      |  |  |  |  |  |  |  |  |  |  |              |
| Fibrinogeno                             |                      |  |  |  |  |  |  |  |  |  |  |              |
| <b>Medicación</b>                       |                      |  |  |  |  |  |  |  |  |  |  | <b>Total</b> |
| Oxitocina bolo iv (3 UI)                |                      |  |  |  |  |  |  |  |  |  |  |              |
| Oxitocina<br>40 UI / 500cc/125ml/h      |                      |  |  |  |  |  |  |  |  |  |  |              |
| Methergin                               |                      |  |  |  |  |  |  |  |  |  |  |              |
| Hemabate<br>250mcg                      |                      |  |  |  |  |  |  |  |  |  |  |              |
| Misoprostol                             |                      |  |  |  |  |  |  |  |  |  |  |              |
| <b>Otra Medicación</b>                  |                      |  |  |  |  |  |  |  |  |  |  |              |
|                                         |                      |  |  |  |  |  |  |  |  |  |  |              |
|                                         |                      |  |  |  |  |  |  |  |  |  |  |              |
| <b>8. Analitica</b>                     |                      |  |  |  |  |  |  |  |  |  |  |              |
| Hb/Hto                                  |                      |  |  |  |  |  |  |  |  |  |  |              |
| INR/APTT                                |                      |  |  |  |  |  |  |  |  |  |  |              |
| Fibrinógeno                             |                      |  |  |  |  |  |  |  |  |  |  |              |
| Plaquetas                               |                      |  |  |  |  |  |  |  |  |  |  |              |
| Calcio iónico                           |                      |  |  |  |  |  |  |  |  |  |  |              |
| ph/Bicarbonato                          |                      |  |  |  |  |  |  |  |  |  |  |              |

**9. Plan de actuación / Comentarios:**
