# Supplementary material
Source: Elsevier journal article supplement (https://www.sciencedirect.com/science/article/pii/S0034935613003332)
Supplement: mmc4 [file S0034935613003332:mmc4.pdf]

# HOJA DE DOCUMENTACIÓN DE HEMORRAGIA OBSTETRICA

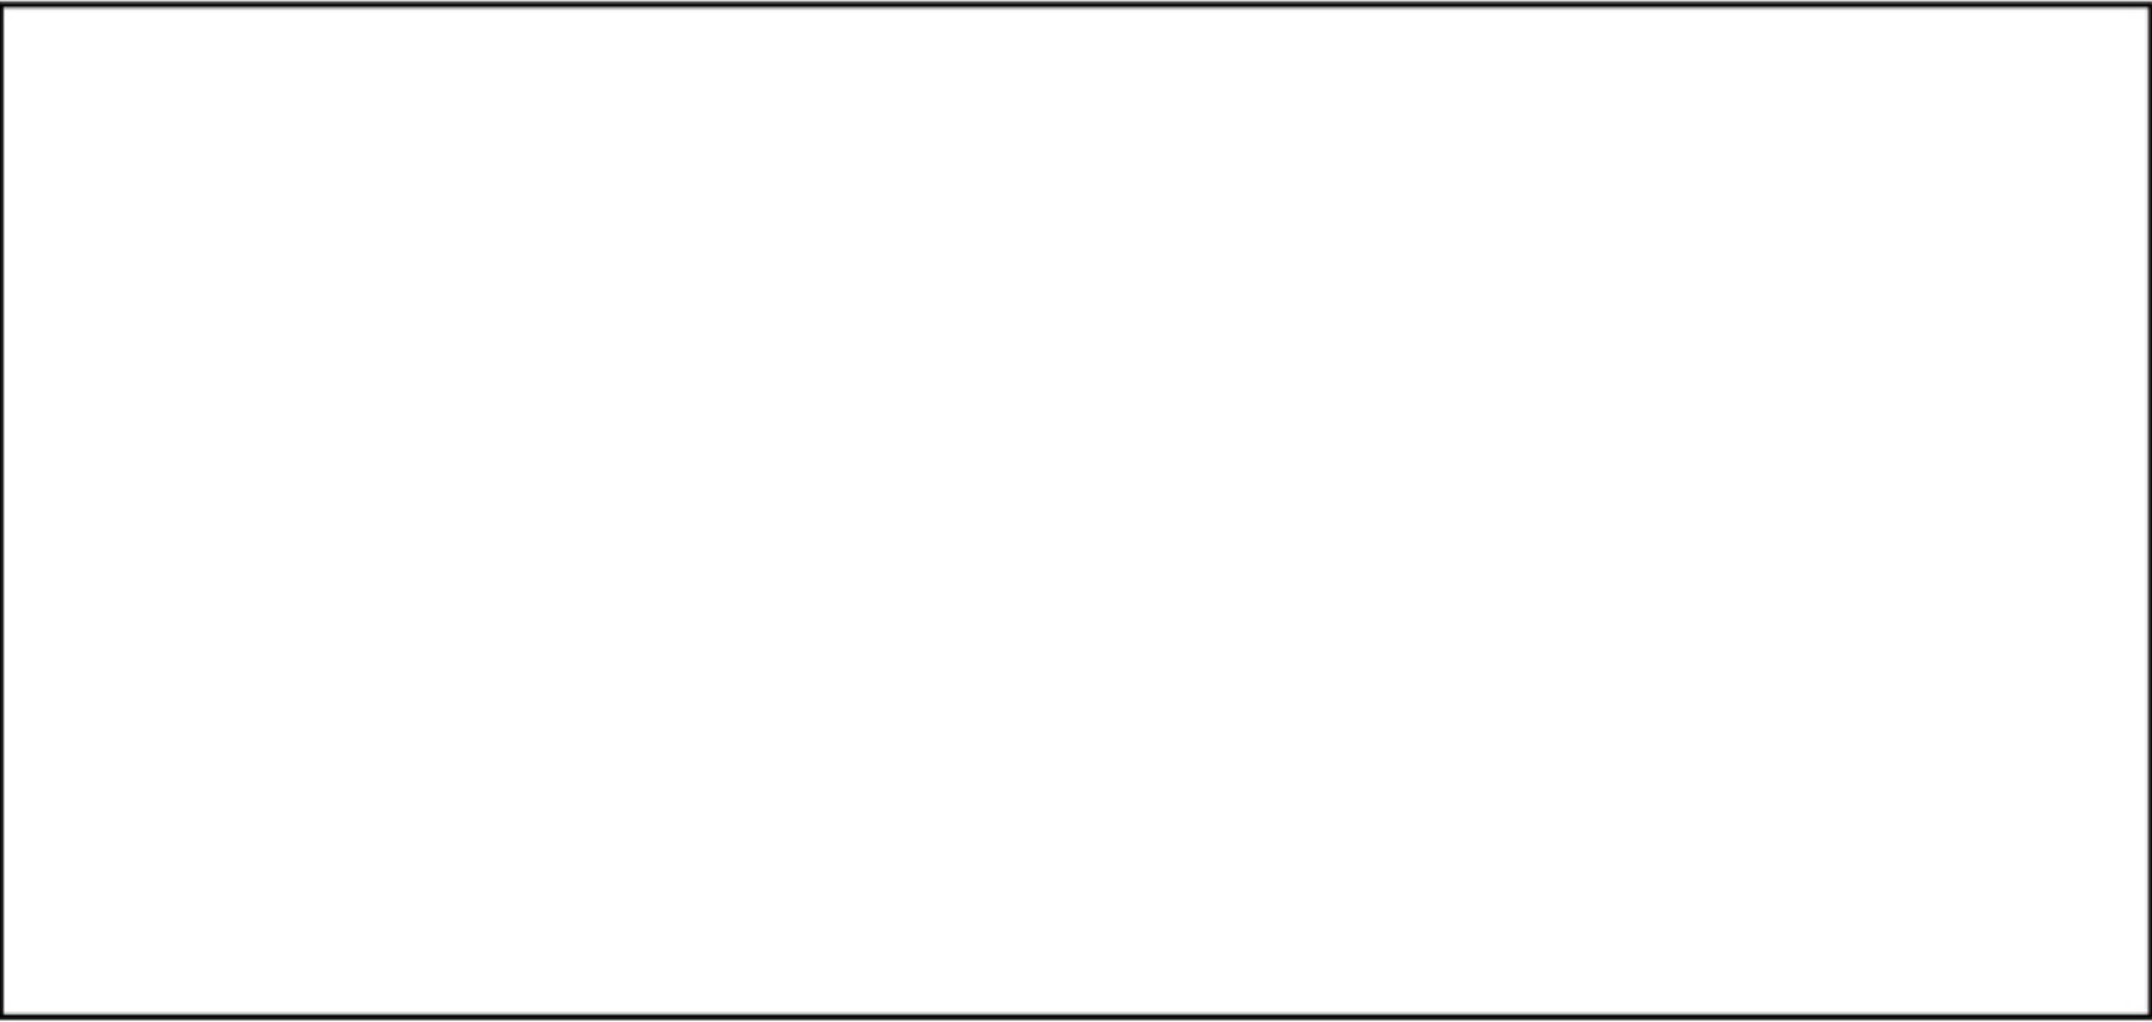

1. Hora del Parto: ..... Duración 3<sup>er</sup> estadio: .....

2. Causa probable del sangrado:   Atonia                      Trauma                      Tejido retenido                      CID

3. Hora de inicio de Sangrado :.....

|                                            |                                |                   |
|--------------------------------------------|--------------------------------|-------------------|
| 4. Perdida de sangre estimada: Total ..... |                                |                   |
| Anteparto: .....                           | 3 <sup>er</sup> estadio: ..... | Postparto : ..... |

## 5. Personal y hora de llegada

| Nombre | hora de llegada | Nombre | Tiempo de llegada |
|--------|-----------------|--------|-------------------|
|        |                 |        |                   |
|        |                 |        |                   |
|        |                 |        |                   |
|        |                 |        |                   |
|        |                 |        |                   |
|        |                 |        |                   |

## 6. Exploración

| Unsd.            | Revisado por: | Problema Identificado | Actuación requerida | Tiempo |
|------------------|---------------|-----------------------|---------------------|--------|
| Vulva/<br>Periné |               |                       |                     |        |
|                  |               |                       |                     |        |
|                  |               |                       |                     |        |
|                  |               |                       |                     |        |
|                  |               |                       |                     |        |
| Vagina           |               |                       |                     |        |
|                  |               |                       |                     |        |
|                  |               |                       |                     |        |
|                  |               |                       |                     |        |
|                  |               |                       |                     |        |
| Cervix           |               |                       |                     |        |
|                  |               |                       |                     |        |
|                  |               |                       |                     |        |
|                  |               |                       |                     |        |
|                  |               |                       |                     |        |
| Utero            |               |                       |                     |        |
|                  |               |                       |                     |        |
|                  |               |                       |                     |        |
|                  |               |                       |                     |        |
|                  |               |                       |                     |        |
| Otros            |               |                       |                     |        |
|                  |               |                       |                     |        |
|                  |               |                       |                     |        |
|                  |               |                       |                     |        |
|                  |               |                       |                     |        |

|                                                                                                       |                      |  |  |  |  |  |  |  |  |  |  |       |
|-------------------------------------------------------------------------------------------------------|----------------------|--|--|--|--|--|--|--|--|--|--|-------|
| Activación de Protocolo HOS:      Si <input type="checkbox"/> No <input type="checkbox"/> Hora: ..... |                      |  |  |  |  |  |  |  |  |  |  |       |
| Fecha y hora de comienzo de HO<br>.....                                                               | Hora de observación: |  |  |  |  |  |  |  |  |  |  |       |
|                                                                                                       |                      |  |  |  |  |  |  |  |  |  |  | Total |
| Constantes                                                                                            |                      |  |  |  |  |  |  |  |  |  |  |       |
| Temperatura                                                                                           |                      |  |  |  |  |  |  |  |  |  |  |       |
| Presion arterial S/D<br>PAI: si/no                                                                    |                      |  |  |  |  |  |  |  |  |  |  |       |
| Frecuencia cardiaca                                                                                   |                      |  |  |  |  |  |  |  |  |  |  |       |
| Saturacion O2                                                                                         |                      |  |  |  |  |  |  |  |  |  |  |       |
| Diuresis /<br>Tiempo de cateterización                                                                |                      |  |  |  |  |  |  |  |  |  |  |       |
| Fluidos                                                                                               |                      |  |  |  |  |  |  |  |  |  |  | Total |
| Ringer lactato / Plasmalite                                                                           |                      |  |  |  |  |  |  |  |  |  |  |       |
| S.Salino                                                                                              |                      |  |  |  |  |  |  |  |  |  |  |       |
| Voluven                                                                                               |                      |  |  |  |  |  |  |  |  |  |  |       |
| Hemoderivados                                                                                         |                      |  |  |  |  |  |  |  |  |  |  |       |
| Tipo de sangre                                                                                        |                      |  |  |  |  |  |  |  |  |  |  |       |
| CH                                                                                                    |                      |  |  |  |  |  |  |  |  |  |  |       |
| PFC                                                                                                   |                      |  |  |  |  |  |  |  |  |  |  |       |
| Plaquetas                                                                                             |                      |  |  |  |  |  |  |  |  |  |  |       |
| Fibrinogeno                                                                                           |                      |  |  |  |  |  |  |  |  |  |  |       |
| Medicación                                                                                            |                      |  |  |  |  |  |  |  |  |  |  | Total |
| Oxitocina bolo iv (3 UI)                                                                              |                      |  |  |  |  |  |  |  |  |  |  |       |
| Oxitocina<br>40 UI / 500cc/125ml/h                                                                    |                      |  |  |  |  |  |  |  |  |  |  |       |
| Methergin                                                                                             |                      |  |  |  |  |  |  |  |  |  |  |       |
| Hemabate<br>250mcg                                                                                    |                      |  |  |  |  |  |  |  |  |  |  |       |
| Misoprostol                                                                                           |                      |  |  |  |  |  |  |  |  |  |  |       |
| Otra Medicación                                                                                       |                      |  |  |  |  |  |  |  |  |  |  |       |
|                                                                                                       |                      |  |  |  |  |  |  |  |  |  |  |       |
|                                                                                                       |                      |  |  |  |  |  |  |  |  |  |  |       |
| 8. Analitica                                                                                          |                      |  |  |  |  |  |  |  |  |  |  |       |
| Hb/Hto                                                                                                |                      |  |  |  |  |  |  |  |  |  |  |       |
| INR/APTT                                                                                              |                      |  |  |  |  |  |  |  |  |  |  |       |
| Fibrinógeno                                                                                           |                      |  |  |  |  |  |  |  |  |  |  |       |
| Plaquetas                                                                                             |                      |  |  |  |  |  |  |  |  |  |  |       |
| Calcio iónico                                                                                         |                      |  |  |  |  |  |  |  |  |  |  |       |
| ph/Bicarbonato                                                                                        |                      |  |  |  |  |  |  |  |  |  |  |       |
|                                                                                                       |                      |  |  |  |  |  |  |  |  |  |  |       |
| 9. Plan de actuación / Comentarios:                                                                   |                      |  |  |  |  |  |  |  |  |  |  |       |
