# Supplementary material
Source: Elsevier journal article supplement (https://www.sciencedirect.com/science/article/pii/S0034935613003332)
Supplement: mmc5 [file S0034935613003332:mmc5.pdf]

## **Anexo on-line 1:**

### **Organización y funcionamiento: Definición de responsabilidades.**

Si bien la mayoría de las guías clínicas coinciden en protocolizar el tratamiento de la HOS, no hay suficientes publicaciones que apoyen la creación de equipos de emergencia obstétrica específicos, aunque esto sería deseable <sup>1</sup>. En este punto, la adaptación del protocolo al centro de trabajo es indispensable. Evidentemente no es lo mismo trabajar en un Hospital de referencia Obstétrica que en uno comarcal, y tendremos que aplicar las recomendaciones internacionales a nuestro entorno. Nosotros proponemos como punto de partida la siguiente organización:

#### **1.- Servicio de Anestesiología y Ginecología:**

1.1.- Activación del protocolo de HOS por el anestesiólogo o el obstetra responsables de la paciente.

1.2.- Avisar telefónicamente al Banco de Sangre (BS) para comunicar la activación, exponiendo claramente quién va a ser el interlocutor y un teléfono de contacto.

1.3.- Enviar al BS lo antes posible una petición y muestra de pruebas cruzadas correctamente identificadas. Es muy relevante la comprobación inequívoca de la identidad de la paciente en la cumplimentación de la petición, la extracción de las pruebas cruzadas y el acto transfusional.

1.4.- Informar al BS de la vigencia de la situación urgente y de la desactivación del protocolo una vez estabilizada la paciente.

1.5.- Devolver todos los hemoderivados no utilizados al BS en un plazo máximo de 3 horas desde que fueron recogidos (según las normas de nuestro Banco de Sangre, aunque otros pueden tener normativas diferentes al respecto).

1.6.- Cuando sea posible disponer de más de un anestesiólogo para la reanimación, se recomienda que el anestesiólogo responsable dirija todas las medidas de reanimación y anestesia sin implicarse en la realización de técnicas manuales, a no ser estrictamente necesario. El(los) anestesiólogo(s) de apoyo junto con el médico residente serán los responsables de la realización de dichas técnicas. Este punto debe adaptarse evidentemente al personal disponible y a la organización del Servicio de Anestesiología en cada centro.

## **2.- Servicio de Hemoterapia. Banco de Sangre:**

Responsable del mantenimiento del suministro de los hemoderivados establecidos por protocolo y de aquellos que sean solicitados posteriormente.

## **3.- Servicio de Análisis clínicos:**

Compromiso de priorizar las determinaciones analíticas y obviar deficiencias tolerables en las peticiones que no comprometan la seguridad, hasta la desactivación del protocolo, momento en que serán solventadas.

## **4.- Servicio de Radiología. Radiología Intervencionista:**

A criterio del obstetra y anestesiólogo se solicitará la opinión o presencia del radiólogo intervencionista para valorar la embolización terapéutica del foco hemorrágico.

## **5.- Enfermería:**

El personal de apoyo se encargará como tarea principal de la cumplimentación de la hoja de documentación de sucesos (figura 4) y de la recepción de hemoderivados y

comprobación compartida de los mismos. Ayudara al Servicio de Anestesia en las otras tareas sin descuidar su cometido principal.

El personal circulante realizará tareas de soporte al servicio de anestesia y obstetricia (preparación del infusor rápido, canalización de vías venosas y arteriales...), así como de la extracción seriada de muestras para laboratorio cada 30 minutos o cuando sean requeridas.

La supervisoras de quirófanos de maternidad y paritorios serán responsables de la revisión y optimización de los recursos necesarios para la correcta ejecución del protocolo (fármacos, aparataje y personal) que se especifiquen al respecto. Estas funciones las podrán delegar en personal de su confianza, dando a conocer dicha decisión a los coordinadores de Obstetricia y Anestesiología. También se debe adaptar aquí para cada centro la disponibilidad y organización del personal de Enfermería.

#### **6.- Personal sanitario:**

Estarán de presencia física en quirófano y en comunicación directa con el responsable de la reanimación. Se les asignará un teléfono móvil para agilizar la comunicación.

#### **BIBLIOGRAFIA**

1. Al Kadri HM. Obstetric medical emergency teams are a step forward in maternal safety! J Emerg Trauma Shock. 2010; 3(4): 337-41.
