# Supplementary material
Source: Elsevier journal article supplement (https://www.sciencedirect.com/science/article/pii/S0034935613003332)
Supplement: mmc6 [file S0034935613003332:mmc6.pdf]

## **Anexo *on-line* 2: Recursos**

### **1.- Humanos:**

Se activaran según el flujo de llamadas definido en la figura 3 (disponible *on-line*). Insistimos de nuevo en la necesidad de adaptación a cada hospital. Evidentemente no es lo mismo un hospital comarcal que uno terciario con docencia MIR, por ejemplo. En nuestro centro planteamos la siguiente disponibilidad de recursos humanos:

- Anestesiólogo responsable
- Obstetra responsable
- Anestesiólogo de apoyo
- Obstetra de apoyo
- Dos enfermeros del quirófano de urgencias
- Dos enfermeros de apoyo del personal de quirófanos de urgencias y URPA, libre de carga asistencial
- Auxiliar de enfermería del quirófano de urgencias
- Sanitario de quirófano
- Sanitario de apoyo

### **2.- Farmacológicos:**

Se enumera el stock mínimo necesario (tabla 6, disponible *on-line*), que diariamente se comprobará en cada turno por el personal asignado. Posteriormente, será firmado en el libro de existencias dispuesto a tal efecto. La medicación se ubicará en dos contenedores adecuadamente rotulados con las siglas de HOS. Uno de ellos se utilizará para fármacos dependientes de nevera.

### **3.- Materiales:**

Se recomienda en el quirófano de urgencias/URPA la existencia de un infusor rápido con tres sistemas de infusión, 6 sistemas de infusión manual, 8 equipos de

canalización de arteria, 4 para canalización de vía central, 2 mantas térmicas de flujo de aire, 2 sondas de monitorización de temperatura y 2 balones de Bakri, además de los impresos de documentación de HO y de alerta precoz, consentimiento informado, pruebas cruzadas y analíticas. Estos impresos estarán archivados en una carpeta debidamente rotulada y clasificados en subcarpetas.

En paritorio se recomienda la existencia de 6 sistemas de infusión manual e impresos de documentación de HO y de alerta precoz.

| <b>Tabla 6: Recursos farmacológicos.</b>                    |                                                                                                                                         |
|-------------------------------------------------------------|-----------------------------------------------------------------------------------------------------------------------------------------|
| <b>Listado de medicación en paritorio</b>                   |                                                                                                                                         |
| <b>Syntocinon</b>                                           | 15 ampollas                                                                                                                             |
| <b>Methergin</b>                                            | 10 ampollas                                                                                                                             |
| <b>Hemabate</b>                                             | 16 ampollas                                                                                                                             |
| <b>Cytotec</b>                                              | 5 comprimidos                                                                                                                           |
| <b>Amchafibrin</b>                                          | 8 ampollas                                                                                                                              |
| <b>Listado de medicación en quirófano de urgencias/URPA</b> |                                                                                                                                         |
| <b>Syntocinon</b>                                           | 15 ampollas                                                                                                                             |
| <b>Methergin</b>                                            | 10 ampollas                                                                                                                             |
| <b>Hemabate</b>                                             | 16 ampollas                                                                                                                             |
| <b>Cytotec</b>                                              | 5 comprimidos                                                                                                                           |
| <b>Amchafibrin</b>                                          | 8 ampollas                                                                                                                              |
| <b>Fibrinógeno</b>                                          | 12 viales                                                                                                                               |
| <b>Novoseven</b>                                            | 2 viales de 5mg, 1 vial de 2mg, 1 vial de 1mg                                                                                           |
| <b>Cloruro Cálcico</b>                                      | 10 ampollas                                                                                                                             |
| <b>Noradrenalina</b>                                        | 4 ampollas                                                                                                                              |
| <b>Dobutamina</b>                                           | 4 ampollas                                                                                                                              |
| <b>Plasmalyte</b>                                           | 9 unidades de 500ml                                                                                                                     |
| <b>Octaplex</b>                                             | 6 viales (no se contempla en el protocolo de HOS. La única indicación es la coagulopatía fulminante en espera de la transfusión de PFC) |
| <b>Bicarbonato 1/6 M y 1M</b>                               | 4 envases de cada uno                                                                                                                   |
