# Supplementary material
Source: Elsevier journal article supplement (https://www.sciencedirect.com/science/article/pii/S0034935613003332)
Supplement: mmc8 [file S0034935613003332:mmc8.pdf]

#### **Anexo on-line 4:**

##### **Revisión y evaluación.**

Todas las activaciones del protocolo de HOS serán registradas por el grupo de revisión científica asignado en el protocolo.

El Protocolo de HOS será evaluado por el grupo de trabajo de revisión científica anualmente con la finalidad de introducir posibles modificaciones y obtener los índices para la validación en nuestro medio.

Analizaremos los siguientes indicadores:

1. Número de HO
2. Número de HOS
3. Porcentajes de activaciones que no han precisado de transfusión masiva.
4. Requerimientos de hemoderivados hasta la estabilización clínica
5. Tiempo medio desde la activación hasta la administración del primer hemoderivado.
6. Tasa de hemoderivados devueltos / no administrados.
7. Porcentaje de administración de hemostáticos: Ac Tranexámico, rFVIIa.
8. Porcentaje de reacciones transfusionales.
9. Porcentaje de sucesos trombóticos.
10. Evaluación de la escala de detección precoz de sucesos adversos.
11. Eficacia de las medidas intervencionistas en el tratamiento de la atonía uterina.

Finalmente, el Protocolo de HOS será actualizado por el grupo de trabajo al menos cada dos años o antes en caso de que la publicación de nuevos datos en la bibliografía o de fallos detectados en las evaluaciones lo aconsejen.
